# Supplementary material for: Ten-year assessment of a cancer fast-track programme to connect primary care with oncology: reducing time from initial symptoms to diagnosis and treatment initiation
Source: PubMed Central journal article supplement — ESMO Open. 2021 May 11;6(3):100148. doi: 10.1016/j.esmoop.2021.100148 (PMC8136438; doi:10.1016/j.esmoop.2021.100148), 2021-05-11
Supplement: mmc1.pdf [file mmc1.pdf]

# Fast-Track Programme Guidelines.

## 1. Lymph node fast track.

### Lymph nodes, must meet all criteria:

- Size: > 2 cm.
  - Time course: more than 4 weeks.
  - No attributable local cause.
  - Location: lateral cervical, supraclavicular, axillary, inguinal.
- Complimentary data:
- General symptoms (sweating, weight loss, fever): YES / NO
  - Previous anti-inflammatory and/or antibiotic treatment: YES / NO

### Referral:

- Lateral cervical and supraclavicular lymph nodes are referred to the Head and Neck unit.
- Axillary and inguinal lymph nodes are referred to Haematology.

## 2. Digestive tumours fast track.

### Must fulfil at least one of the following:

- Age > 40 years and jaundice with no known cause.
  - Age > 40 years and dark red rectal bleeding with change in bowel habits (softer and more frequent stool during at least 6 weeks).
  - Age > 60 years and dark red rectal bleeding.
  - Age > 60 years and change in bowel habits (softer and more frequent stool during at least 6 weeks).
  - Male, any age, unexplained iron deficiency anaemia and haemoglobin  $\leq 12$  g/dl.
  - Female, postmenopausal, unexplained iron deficiency anaemia and haemoglobin  $\leq 11$  g/dl.
  - Female, perimenopausal, iron deficiency and positive FOBT\*.
  - Palpable abdominal mass in the lower right quadrant.
  - Palpable rectal mass through rectal examination.
  - Dysphagia plus constitutional symptoms.
  - Ascites, in a non-cirrhotic patient.
- Complimentary data:
- Positive FOBT\*: YES / NO

\*FOBT: Faecal occult blood test

### 3. Gynaecologic tumours fast track.

**Must fulfil at least one or the following:**

- Pathologic cervicovaginal cytology (\*):
  - HSIL (CIN II-III).
  - ASC-H.
  - Cervical cancer.
  - HPV+, genotypes 16, 18 and/or 45.
- Postmenopausal uterine bleeding.
- Ascites or abdominal distension, with no attributable cause.
- Palpable abdominal pelvic mass.
- Palpable vulvar, vaginal or cervical mass.
- Ulcerative lesions or leukoplakia on the vulva, vagina and/or cervix.

\*HSIL: high-grade intraepithelial lesion. CIN: cervical intraepithelial neoplasia. ASC-H: Atypical Squamous Cells, cannot rule out HSIL. HPV: Human papillomavirus.

### 4. Breast pathology fast track.

**Must fulfil at least one or the following:**

- Palpable breast lump: solid consistency, recent appearance, and attached to deep tissue.
  - Nipple or breast skin retraction, recent appearance.
  - Abnormal nipple discharge.
  - Breast *peau d'orange* plus inflammation (redness, heat, swelling, pain) of recent appearance.
  - Skin lesions suggestive of Paget's disease of the breast.
- Complimentary data:
- Previous breast disease: YES / NO.

### 5. Lung tumours fast track.

**Must fulfil at least one or the following:**

- Haemoptysis
- Thorax x-ray suggestive of lung cancer: nodule, mass, atelectasis, mediastinal widening. Pulmonary consolidation with slow resolution. Pleural effusion.

## 6. Urological tumours fast track.

### Must fulfil at least one or the following:

- Testicular, kidney or bladder mass; confirmed through ultrasonography.
- PSA\* elevation, confirmed in two measurements, separated 4-6 weeks.
  - PSA > 10 ng/ml.
  - PSA > 4 ng/ml and free PSA < 20%.
  - Altered PSA velocity: yearly increase greater than 0.75 ng/ml, in absence of concomitant urinary tract infection.
- Haematuria, if:
  - Macroscopic.
  - Accompanied by urethral syndrome (not explained by inflammatory or infectious disease).
  - Repetition asymptomatic microhaematuria, in a smoker.

\*PSA: prostate-specific antigen.

## 8. Soft tissue and bone tumours fast track.

### Must fulfil at least one or the following:

- Palpable, hard mass located in soft tissues, >3-week time course.
- Articular tumour with inflammatory signs, with no response to anti-inflammatory treatment.
- Imaging findings of a suspicious bone lesion.

## 7. Head and neck tumours fast track.

### Must fulfil at least one or the following:

- Oral cavity or lip ulcers, >3-week time course. Erythroleukoplakia and erythroplakia.
- Dysphonia, >6-week time course (chest x-ray required).
- Dysphagia, >3-week time course.

## 9. Skin disease fast track.

**Suspicion of melanoma as based on a score of  $\geq 3$  in the Glasgow 7-point checklist:**

- Major features (2 points):
  - Change in size of lesion.
  - Irregular pigmentation.
  - Irregular border.
- Minor features (1 point):
  - Inflammation.
  - Itch or altered sensation.
  - Larger than other lesions (diameter  $>7\text{mm}$ ).
  - Oozing/crusting of lesion.

## 10. Other signs and symptoms of cancer

- Constitutional symptoms: asthenia, anorexia and weight loss.
- Abnormal findings on diagnostic imaging.
- Other signs or symptoms, highly suggestive of cancer.
